# Supplementary material
Source: MDPI journal article supplement (https://www.mdpi.com/2072-4292/13/2/322)
Supplement: s1 [file s1]

# Supplementary Materials: A Density-Based Algorithm for the Detection of Individual Trees from LiDAR Data

Melissa Latella 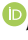, Fabio Sola 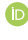 and Carlo Camporeale 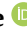

## 1. Literature Review for the Classification of Individual Tree Detection Approaches

Table S1 shows an extensive, albeit not exhaustive, list of the main methods that have been proposed so far for the identification of individual trees from LiDAR data. This review begins from the 2000s, when active remote sensing devices began to be widely used in forestry [1,2], and only considers the applications of the traditional airborne discrete-return LiDAR systems, neglecting the multi-spectral [e.g., 3] and the full-waveform ones [e.g., 4–6]. The algorithm classification (AC), which is reported in the first column of Table S1, refers to the classification described in Section 1 and displayed in Figure 1 of the companion manuscript.

We remark that the list does not include the recent branch of Terrestrial Laser Scanning (TLS) systems. While Airborne Laser Scanning (ALS) systems provide complementary information for forest inventory in terms of tree number, areal stem density and tree height over large areas (up to the regional scale), TLSs give high point density data and allow for three-dimensional tree reconstruction, but can investigate relatively small areas [see 7–10, for further details].

**Table S1.** Methods described in the literature (2001–2019) for the identification of individual trees starting from LiDAR data. Part of the information is taken from Lu *et al.* [11]. AC refers to the approach classification shown in Figure 1 of the companion manuscript; FT is the forest type (C coniferous, D deciduous, O other); LC is the leaf condition (ON - OFF); PD is the point density (points·m<sup>-2</sup>); - means not-specified.

| AC    | Short description                                                                                                                                                                           | Reference                     | FT    | LC  | PD            |
|-------|---------------------------------------------------------------------------------------------------------------------------------------------------------------------------------------------|-------------------------------|-------|-----|---------------|
| A.1.1 | Local maxima method applied after a convolution filter.                                                                                                                                     | Hyypä <i>et al.</i> [12]      | C     | ON  | 8.0 -<br>10.0 |
| A.1.1 | Local maxima method whose spatial scale is selected by choosing the parabolic surface that leads to the smallest residuals when fitting the CHM.                                            | Persson <i>et al.</i> [13]    | C - D | -   | -             |
| A.1.1 | Local maxima method applied to the CHM created by performing Gaussian smoothing at different scales.                                                                                        | Brandtberg <i>et al.</i> [14] | D     | OFF | 12.0          |
| A.1.1 | Local maxima method with variable window size determined as an allometric function of the height of the local maximum.                                                                      | Popescu and Wynne [15]        | C - D | ON  | 0.5           |
| A.1.1 | Local maxima method applied to smoothed CHMs to detect the treetops. Pouring algorithm for the crown segmentation.                                                                          | Heurich and Weinacker [16]    | C - D | -   | 10.0          |
| A.1.1 | Local and quasi-maxima selection and removal of the non-trees by means of an adaptive filter.                                                                                               | Pitkänen <i>et al.</i> [17]   | C - D | -   | 10.0          |
| A.1.1 | Local maxima method applied after smoothing filters.                                                                                                                                        | Weinacker <i>et al.</i> [18]  | C - D | -   | -             |
| A.1.1 | Comparison between the used of the local maxima method applied to the CHM and the canopy maxima model (CMM) to select the treetops. Marker-controlled watershed for the crown segmentation. | Chen <i>et al.</i> [19]       | D     | ON  | 9.5           |
| A.1.1 | Local maxima method applied to smoothed CHMs to detect the treetops. Watershed for the crown segmentation.                                                                                  | Koch <i>et al.</i> [20]       | D     | ON  | 5.0 -<br>10.0 |
| A.1.1 | Local maxima method applied after smoothing filters. Region-growing algorithm for the crown segmentation.                                                                                   | Solberg <i>et al.</i> [21]    | C     | ON  | 5.0           |
| A.1.1 | Local maxima method to detect the treetops. Region-growing algorithm to delineate the crowns.                                                                                               | Pang <i>et al.</i> [22]       | C - D | -   | 1.6 to<br>7.0 |
| A.1.1 | Local maxima method applied to smoothed CHMs to detect the treetops. Watershed for the crown segmentation.                                                                                  | Maltamo <i>et al.</i> [23]    | C     | ON  | 4.0           |
| A.1.1 | Local maxima method applied after a curvature-based smoothing filter. Marker-controlled watershed for the crown segmentation.                                                               | Yu <i>et al.</i> [24]         | C - D | ON  | 2.6           |
| A.1.1 | Local maxima method applied to smoothed CHMs to detect the treetops. Adaptive filtering algorithm for the crown segmentation.                                                               | Ene <i>et al.</i> [25]        | C - D | ON  | 10.4          |

Continued on next page

Table S1. – Continued from previous page

| AC    | Short description                                                                                                                                                                                                                                            | Reference                            | FT    | LC        | PD               |
|-------|--------------------------------------------------------------------------------------------------------------------------------------------------------------------------------------------------------------------------------------------------------------|--------------------------------------|-------|-----------|------------------|
| A.1.1 | Local maxima method applied to filtered CHMs to detect the treetops. Marker-controlled watershed algorithm for the crown segmentation.                                                                                                                       | Jing <i>et al.</i> [26]              | C - D | ON        | 45.0             |
| A.1.1 | Local maxima method to detect the treetops. Region-growing algorithm for the crown segmentation.                                                                                                                                                             | Dalponte and Coomes [27]             | C     | ON        | 48.0             |
| A.1.1 | Local maxima method applied with different treetop window sizes and over unsmoothed and smoothed CHMs.                                                                                                                                                       | Silva <i>et al.</i> [28]             | D     | ON        | -                |
| A.1.2 | Local curvature method to detect the treetops applied after that Gaussian filters generate a multi-scale representation of the CHM on the basis of the dominant size of the crowns.                                                                          | Bian <i>et al.</i> [29]              | D     | -         | 8.9 -<br>13.9    |
| A.2.1 | Morphological operations to isolate the treetops by means of conical/elliptical structures that compose the three-dimensional CHM.                                                                                                                           | Andersen <i>et al.</i> [30]          | C     | -         | 3.5              |
| A.2.1 | Morphological filtering methods applied together with methods that fill the missing data and remove the outliers.                                                                                                                                            | Chen [31]                            | -     | -         | -                |
| A.2.1 | Extended maxima transformation of the morphological image-analysis methods applied to the CHM.                                                                                                                                                               | Kwak <i>et al.</i> [32]              | C - D | -         | 1.8              |
| A.2.2 | Watershed algorithm applied to the CHM for the crown segmentation. Local maxima method applied to each crown to detect the treetops.                                                                                                                         | Hirata <i>et al.</i> [33]            | O     | ON        | 40.5             |
| A.2.2 | Watershed algorithm applied to a smoothed CHM. Interpolation of the cloud points underlying the CHM to find the understory canopies and re-application of the watershed algorithm.                                                                           | Duncanson <i>et al.</i> [34]         | D     | ON<br>OFF | - 18.0           |
| A.2.2 | Watershed algorithm applied to the CHM after smoothing and morphological operations.                                                                                                                                                                         | Zhao <i>et al.</i> [35]              | C - D | -         | -                |
| A.2.3 | Valley-following approach applied to the CHM after smoothing filters.                                                                                                                                                                                        | Leckie <i>et al.</i> [36]            | C     | ON        | 2.0              |
| A.2.3 | Identification of individual trees through the convolution of a mexican hat wavelet over the CHM (i.e. spatial wavelet analysis).                                                                                                                            | Falkowski <i>et al.</i> [37]         | C     | ON        | 0.3              |
| A.2.3 | Iterative combination of watershed and morphological algorithms to delineate the crown material.                                                                                                                                                             | González-Ferreiro <i>et al.</i> [38] | D     | ON        | 8.0              |
| A.2.3 | Detection of the contour of the individual trees by applying a graph theory-based algorithm.                                                                                                                                                                 | Wu <i>et al.</i> [39]                | C     | ON        | 7.8 -<br>12.5    |
| B.1   | Local maxima method to detect the treetops that are subsequently used as seeds for the k-means clustering.                                                                                                                                                   | Morsdorf <i>et al.</i> [40]          | C     | -         | 30.0             |
| B.1   | Region-growing algorithm applied downward and starting from the treetops that have been previously detected by a local maxima algorithm.                                                                                                                     | Tiede <i>et al.</i> [1]              | C - D | ON<br>OFF | - 10.0           |
| B.1   | Adaptive multi-scale filter and region-growing algorithm.                                                                                                                                                                                                    | Lee <i>et al.</i> [41]               | C     | ON        | 14.2             |
| B.1   | Region-growing algorithm applied downward and starting from the treetops that have been previously detected by a local maxima algorithm.                                                                                                                     | Richardson and Moskal [42]           | C     | -         | >4.0,<br>>8.0    |
| B.1   | Region-growing algorithm with adaptive threshold that starts from the treetops that have been previously detected by a local maxima method.                                                                                                                  | Li <i>et al.</i> [43]                | C     | ON        | >6.0             |
| B.1   | Morphological and watershed methods applied to the CHM for the crown segmentation. Refinement of segmentation and tree counting through a cloud-based approach.                                                                                              | Hu <i>et al.</i> [44]                | C - D | ON        | 40.0             |
| B.1   | Multi-scale segmentation realized using point kernels of different size. Choice of the best set of apices from the segmented trees and final crown segmentation by using the selected apices as seed point and applying an adaptive neighbourhood algorithm. | Véga <i>et al.</i> [45]              | C - D | -         | 10.0 -<br>17.8   |
| B.1   | Local maxima method to detect the treetops within each horizontal slice of the point cloud and k-means clustering for the crown identification and segmentation.                                                                                             | Kandare <i>et al.</i> [46]           | C - D | -         | 60.0             |
| B.1   | Local maxima method to detect the treetops within each horizontal slice of the point cloud and k-means clustering for the crown identification and segmentation.                                                                                             | Ayrey <i>et al.</i> [47]             | C - D | ON<br>OFF | - 5.0 to<br>21.0 |
| B.1   | Region-growing algorithm combined with morphological segmentation.                                                                                                                                                                                           | Ma <i>et al.</i> [48]                | C     | ON        | 4.0              |

Continued on next page

Table S1. – Continued from previous page

| AC  | Short description                                                                                                                                                                                                                                                                | Reference                                        | FT    | LC        | PD           |
|-----|----------------------------------------------------------------------------------------------------------------------------------------------------------------------------------------------------------------------------------------------------------------------------------|--------------------------------------------------|-------|-----------|--------------|
| B.2 | Detection of the points belonging to the trunks by looking at their intensity value. Identification of the individual trunks starting from the bottom and according to a clustering method.                                                                                      | Lu <i>et al.</i> [11]                            | C - D | ON<br>OFF | - 10.28      |
| B.2 | Treetops identification through a local curvature method applied to locally fitted surfaces and tops used as markers for watershed segmentation of the crowns. Detection of the treetops below the upper canopy layer by estimating the verticality of the points' distribution. | Mongus and Žalik [49]                            | C - D | -         | 25.6 to 96.6 |
| B.3 | Computation of the number of points in a column with windows of specific size for each point. Conversion of the points into a raster with cells of specific size and peaks detection after smoothing.                                                                            | Rahman and Gorte [50], Rahman <i>et al.</i> [51] | C - D | OFF       | 70.0         |
| B.3 | Clustering approach based on the adaptive mean-shift algorithm running on previously defined layers.                                                                                                                                                                             | Ferraz <i>et al.</i> [52]                        | C - O | ON        | 9.9          |
| B.3 | Treetops identification from the CHM and use of the tops as starting points for the angular analysis of the point space to detect sub-dominant trees.                                                                                                                            | Paris <i>et al.</i> [53]                         | C     | ON        | 5.5<br>15.5  |

### Abbreviations

The following abbreviations are used throughout the supplementary material:

|       |                             |
|-------|-----------------------------|
| AC    | Approach Classification     |
| ALS   | Airborne Laser Scanning     |
| C     | Coniferous species          |
| CHM   | Canopy Height Model         |
| CMM   | Canopy Maxima Model         |
| D     | Deciduous species           |
| FT    | Forest Type                 |
| LC    | Leaf Condition              |
| LiDAR | Light Detection And Ranging |
| O     | Other species               |
| PD    | Point Density               |
| TLS   | Terrestrial Laser Scanning  |

### References

1. Tiede, D.; Hochleitner, G.; Blaschke, T. A full GIS-based workflow for tree identification and tree crown delineation using laser scanning. *ISPRS Workshop CMRT*, 2005, Vol. 5, p. 2005.
2. Zhen, Z.; Quackenbush, L.J.; Zhang, L. Trends in automatic individual tree crown detection and delineation—Evolution of LiDAR data. *Remote Sensing* **2016**, *8*, 333.
3. Dai, W.; Yang, B.; Dong, Z.; Shaker, A. A new method for 3D individual tree extraction using multispectral airborne LiDAR point clouds. *ISPRS journal of photogrammetry and remote sensing* **2018**, *144*, 400–411.
4. Reitberger, J.; Schnörr, C.; Krzystek, P.; Stilla, U. 3D segmentation of single trees exploiting full waveform LIDAR data. *ISPRS Journal of Photogrammetry and Remote Sensing* **2009**, *64*, 561–574.
5. Gupta, S.; Weinacker, H.; Koch, B. Comparative analysis of clustering-based approaches for 3-D single tree detection using airborne fullwave lidar data. *Remote Sensing* **2010**, *2*, 968–989.
6. Yao, W.; Krzystek, P.; Heurich, M. Tree species classification and estimation of stem volume and DBH based on single tree extraction by exploiting airborne full-waveform LiDAR data. *Remote Sensing of Environment* **2012**, *123*, 368–380.
7. Liang, X.; Litkey, P.; Hyypä, J.; Kaartinen, H.; Kukko, A.; Holopainen, M. Automatic plot-wise tree location mapping using single-scan terrestrial laser scanning. *Photogramm. J. Finland* **2011**, *22*, 37–48.
8. Olofsson, K.; Holmgren, J.; Olsson, H. Tree stem and height measurements using terrestrial laser scanning and the RANSAC algorithm. *Remote sensing* **2014**, *6*, 4323–4344.
9. Trochta, J.; Krůček, M.; Vrška, T.; Král, K. 3D Forest: An application for descriptions of three-dimensional forest structures using terrestrial LiDAR. *PloS one* **2017**, *12*, e0176871.
10. Kuželka, K.; Slavík, M.; Surový, P. Very High Density Point Clouds from UAV Laser Scanning for Automatic Tree Stem Detection and Direct Diameter Measurement. *Remote Sensing* **2020**, *12*, 1236.

11. Lu, X.; Guo, Q.; Li, W.; Flanagan, J. A bottom-up approach to segment individual deciduous trees using leaf-off lidar point cloud data. *ISPRS Journal of Photogrammetry and Remote sensing* **2014**, *94*, 1–12.
12. Hyypä, J.; Kelle, O.; Lehtikoinen, M.; Inkinen, M. A segmentation-based method to retrieve stem volume estimates from 3-D tree height models produced by laser scanners. *IEEE Transactions on Geoscience and Remote Sensing* **2001**, *39*, 969–975.
13. Persson, A.; Holmgren, J.; Soderman, U. Detecting and measuring individual trees using an airborne laser scanner. *Photogrammetric Engineering and Remote Sensing* **2002**, *68*, 925–932.
14. Brandtberg, T.; Warner, T.A.; Landenberger, R.E.; McGraw, J.B. Detection and analysis of individual leaf-off tree crowns in small footprint, high sampling density lidar data from the eastern deciduous forest in North America. *Remote sensing of Environment* **2003**, *85*, 290–303.
15. Popescu, S.C.; Wynne, R.H. Seeing the trees in the forest. *Photogrammetric Engineering & Remote Sensing* **2004**, *70*, 589–604.
16. Heurich, M.; Weinacker, H. Automated tree detection and measurement in temperate forests of central Europe using laser scanning data. *ISPRS International Archives of the Photogrammetry, Remote Sensing and Spatial Information Sciences* **2004**, *36*, 8.
17. Pitkänen, J.; Maltamo, M.; Hyypä, J.; Yu, X. Adaptive methods for individual tree detection on airborne laser based canopy height model. *International Archives of Photogrammetry, Remote Sensing and Spatial Information Sciences* **2004**, *36*, 187–191.
18. Weinacker, H.; Koch, B.; Heyder, U.; Weinacker, R. Development of filtering, segmentation and modelling modules for lidar and multispectral data as a fundament of an automatic forest inventory system. *International Archives of Photogrammetry, Remote Sensing and Spatial Information Sciences* **2004**, *36*, W2.
19. Chen, Q.; Baldocchi, D.; Gong, P.; Kelly, M. Isolating individual trees in a savanna woodland using small footprint lidar data. *Photogrammetric Engineering & Remote Sensing* **2006**, *72*, 923–932.
20. Koch, B.; Heyder, U.; Weinacker, H. Detection of individual tree crowns in airborne lidar data. *Photogrammetric Engineering & Remote Sensing* **2006**, *72*, 357–363.
21. Solberg, S.; Naesset, E.; Bollandsas, O.M. Single tree segmentation using airborne laser scanner data in a structurally heterogeneous spruce forest. *Photogrammetric Engineering & Remote Sensing* **2006**, *72*, 1369–1378.
22. Pang, Y.; Lefsky, M.; Andersen, H.E.; Miller, M.; Sherrill, K. Validation of the ICESat vegetation product using crown-area-weighted mean height derived using crown delineation with discrete return lidar data. *Canadian Journal of Remote Sensing* **2008**, *34*, S471–S484. doi:10.5589/m08-074.
23. Maltamo, M.; Peuhkurinen, J.; Malinen, J.; Vauhkonen, J.; Packalén, P.; Tokola, T. Predicting tree attributes and quality characteristics of Scots pine using airborne laser scanning data. *Silva Fennica* **2009**, *43*, 507–521.
24. Yu, X.; Hyypä, J.; Vastaranta, M.; Holopainen, M.; Viitala, R. Predicting individual tree attributes from airborne laser point clouds based on the random forests technique. *ISPRS Journal of Photogrammetry and remote sensing* **2011**, *66*, 28–37.
25. Ene, L.; Naesset, E.; Gobakken, T. Single tree detection in heterogeneous boreal forests using airborne laser scanning and area-based stem number estimates. *International Journal of Remote Sensing* **2012**, *33*, 5171–5193.
26. Jing, L.; Hu, B.; Li, J.; Noland, T. Automated delineation of individual tree crowns from LiDAR data by multi-scale analysis and segmentation. *Photogrammetric Engineering & Remote Sensing* **2012**, *78*, 1275–1284.
27. Dalponte, M.; Coomes, D.A. Tree-centric mapping of forest carbon density from airborne laser scanning and hyperspectral data. *Methods in ecology and evolution* **2016**, *7*, 1236–1245.
28. Silva, C.A.; Hudak, A.T.; Vierling, L.A.; Loudermilk, E.L.; O'Brien, J.J.; Hiers, J.K.; Jack, S.B.; Gonzalez-Benecke, C.; Lee, H.; Falkowski, M.J.; others. Imputation of individual longleaf pine (*Pinus palustris* Mill.) tree attributes from field and LiDAR data. *Canadian journal of remote sensing* **2016**, *42*, 554–573.
29. Bian, Y.; Zou, P.; Shu, Y.; Yu, R. Individual tree delineation in deciduous forest areas with LiDAR point clouds. *Canadian Journal of Remote Sensing* **2014**, *40*, 152–163.
30. Andersen, H.E.; Reutebuch, S.E.; Schreuder, G.F. Automated individual tree measurement through morphological analysis of a LIDAR-based canopy surface model. Proc. of the 1st International Precision Forestry Symposium, 2001, pp. 11–21.
31. Chen, Q. Airborne lidar data processing and information extraction. *Photogrammetric engineering and remote sensing* **2007**, *73*, 109.
32. Kwak, D.A.; Lee, W.K.; Lee, J.H.; Biging, G.S.; Gong, P. Detection of individual trees and estimation of tree height using LiDAR data. *Journal of Forest Research* **2007**, *12*, 425–434.
33. Hirata, Y.; Furuya, N.; Suzuki, M.; Yamamoto, H. Airborne laser scanning in forest management: Individual tree identification and laser pulse penetration in a stand with different levels of thinning. *Forest Ecology and Management* **2009**, *258*, 752–760.
34. Duncanson, L.; Cook, B.; Hurtt, G.; Dubayah, R. An efficient, multi-layered crown delineation algorithm for mapping individual tree structure across multiple ecosystems. *Remote Sensing of Environment* **2014**, *154*, 378–386.
35. Zhao, D.; Pang, Y.; Li, Z.; Liu, L. Isolating individual trees in a closed coniferous forest using small footprint lidar data. *International journal of remote sensing* **2014**, *35*, 7199–7218.
36. Leckie, D.; Gougeon, F.; Hill, D.; Quinn, R.; Armstrong, L.; Shreenan, R. Combined high-density lidar and multispectral imagery for individual tree crown analysis. *Canadian Journal of Remote Sensing* **2003**, *29*, 633–649.
37. Falkowski, M.J.; Smith, A.M.; Hudak, A.T.; Gessler, P.E.; Vierling, L.A.; Crookston, N.L. Automated estimation of individual conifer tree height and crown diameter via two-dimensional spatial wavelet analysis of lidar data. *Canadian Journal of Remote Sensing* **2006**, *32*, 153–161.

38. González-Ferreiro, E.; Diéguez-Aranda, U.; Barreiro-Fernández, L.; Buján, S.; Barbosa, M.; Suárez, J.C.; Bye, I.J.; Miranda, D. A mixed pixel-and region-based approach for using airborne laser scanning data for individual tree crown delineation in *Pinus radiata* D. Don plantations. *International journal of remote sensing* **2013**, *34*, 7671–7690.
39. Wu, B.; Yu, B.; Wu, Q.; Huang, Y.; Chen, Z.; Wu, J. Individual tree crown delineation using localized contour tree method and airborne LiDAR data in coniferous forests. *International journal of applied earth observation and geoinformation* **2016**, *52*, 82–94.
40. Morsdorf, F.; Meier, E.; Kötz, B.; Itten, K.I.; Dobbertin, M.; Allgöwer, B. LIDAR-based geometric reconstruction of boreal type forest stands at single tree level for forest and wildland fire management. *Remote sensing of environment* **2004**, *92*, 353–362.
41. Lee, H.; Slatton, K.C.; Roth, B.E.; Cropper Jr, W. Adaptive clustering of airborne LiDAR data to segment individual tree crowns in managed pine forests. *International Journal of Remote Sensing* **2010**, *31*, 117–139.
42. Richardson, J.J.; Moskal, L.M. Strengths and limitations of assessing forest density and spatial configuration with aerial LiDAR. *Remote Sensing of Environment* **2011**, *115*, 2640–2651.
43. Li, W.; Guo, Q.; Jakubowski, M.K.; Kelly, M. A new method for segmenting individual trees from the lidar point cloud. *Photogrammetric Engineering & Remote Sensing* **2012**, *78*, 75–84.
44. Hu, B.; Li, J.; Jing, L.; Judah, A. Improving the efficiency and accuracy of individual tree crown delineation from high-density LiDAR data. *International Journal of Applied Earth Observation and Geoinformation* **2014**, *26*, 145–155.
45. Véga, C.; Hamrouni, A.; El Mokhtari, S.; Morel, J.; Bock, J.; Renaud, J.P.; Bouvier, M.; Durrieu, S. PTrees: A point-based approach to forest tree extraction from lidar data. *International Journal of Applied Earth Observation and Geoinformation* **2014**, *33*, 98–108.
46. Kandare, K.; Ørka, H.O.; Chan, J.C.W.; Dalponte, M. Effects of forest structure and airborne laser scanning point cloud density on 3D delineation of individual tree crowns. *European Journal of Remote Sensing* **2016**, *49*, 337–359.
47. Ayrey, E.; Fraver, S.; Kershaw Jr, J.A.; Kenefic, L.S.; Hayes, D.; Weiskittel, A.R.; Roth, B.E. Layer stacking: a novel algorithm for individual forest tree segmentation from LiDAR point clouds. *Canadian Journal of Remote Sensing* **2017**, *43*, 16–27.
48. Ma, Z.; Pang, Y.; Wang, D.; Liang, X.; Chen, B.; Lu, H.; Weinacker, H.; Koch, B. Individual Tree Crown Segmentation of a Larch Plantation Using Airborne Laser Scanning Data Based on Region Growing and Canopy Morphology Features. *Remote Sensing* **2020**, *12*, 1078.
49. Mongus, D.; Žalik, B. An efficient approach to 3D single tree-crown delineation in LiDAR data. *ISPRS Journal of Photogrammetry and Remote Sensing* **2015**, *108*, 219–233.
50. Rahman, M.; Gorte, B. Individual tree detection based on densities of high points of high resolution airborne LiDAR. Proc. GEOBIA, 2008 - Pixels, Objects, Intelligence: GEOgraphic Object Based Image Analysis for the 21st Century, University of Calgary, Calgary, Alberta, Canada, 2008, pp. 350–355.
51. Rahman, M.; Gorte, B.; others. Tree filtering for high density airborne LiDAR data. International Conference on LiDAR Applications in Forest Assessment and Inventory, Edinburgh, UK. Citeseer, 2008.
52. Ferraz, A.; Bretar, F.; Jacquemoud, S.; Gonçalves, G.; Pereira, L.; Tomé, M.; Soares, P. 3-D mapping of a multi-layered Mediterranean forest using ALS data. *Remote Sensing of Environment* **2012**, *121*, 210–223.
53. Paris, C.; Valduga, D.; Bruzzone, L. A hierarchical approach to three-dimensional segmentation of LiDAR data at single-tree level in a multilayered forest. *IEEE Transactions on Geoscience and Remote Sensing* **2016**, *54*, 4190–4203.
